# Supplementary material
Source: publisher figshare collection journal article supplement (https://karger.figshare.com/ndownloader/files/19959317)
Supplement: Supplementary file 1 [file 19959317]

**Table 1.** Listed are all tested EOs with batch number in square brackets, their manufacturer, product specification and gas chromatographic profile (if available); n.r.=not readable, n.s.=not specified.

| **essential oil**  [batch number] | **manufacturer** | **manufacturer’s information** | | | |
| --- | --- | --- | --- | --- | --- |
| **product specification** | | **chromatographic profile** | |
| **%** | important ingredients | **%** | components |
| **angelica root**  [00190E24] | PRIMAVERA®  LIFE GmbH,  Oy-Mittelberg,  Deutschland | n.s. | n.s. | 0.80  28.59  1.25  0.32  4.32  1.29  5.05  8.21  14.39  0.72  2.12  8.89  9.57  4.57  1.48  0.59  1.01  0.02  0.48  0.55  0.30  0.29  0.22  0.15 | a-Thujene + Tricyclene  a-Pinene  Camphene  Verbenene  Sabinene  b-Pinene  b-Myrcene  a-Phellandrene  d-3-Carene  a-Terpinene  p-Cymene  Limonene + c-b-Ocimene  b-Phellandrene  t-b-Ocimene  g-Terpinene  iso-Terpinolene  Terpinolene  Linalool  Terpinen-4-ol  Bornyl acetate  a-Copaene  a-Humulene  Tridecanolide  Osthol |
| **cinnamon leaf**  [150181] | distributor: Aromaland  Inh. Gerda Foltis, Röttingen-Aufstetten,  Germany | n.s. | n.s. | n.s. | n.s. |
| **clary sage**  [1700-124743] | TAOASIS®  TAOASIS GmbH, Detmold,  Germany | 50 - 78  6.5 - 27  1.0 - 12 | Linalylacetate  Linalool  Germacrene D | 0.74  0.28  25.61  59.57  0.27  2.92  2.92  0.81  1.13  1.65  0.53  1.39 | Myrcene  Limonene  Linalool  Linalylacetate  Teroinen-4-ol  b-Caryophyllene  a-Terpineole  Germcrene D  Nerylacetate  Geranylacetate  Nerol  Geraniol |
| **clove**  n.r. | TAOASIS®  TAOASIS GmbH, Detmold,  Germany | 72 - 88  4.0 - 22  2.0 - 14 | Eugenol  Eugenylacetate  β-Caryophyllene | n.s. | n.s. |
| **coriander seed**  [00027E23] | PRIMAVERA®  LIFE GmbH,  Oy-Mittelberg,  Deutschland | n.s. | n.s. | 6.54  0.83  0.35  1.15  0.92  4.07  5.46  0.51  70.04  4.79  0.27  1.04  1.97 | a-Pinene  Camphene  b-Pinene  b-Myrcene  p-Cymene  Limonene  g-Terpinene  Terpinolene  Linalool  Camphor  a-Terpineol  Geraniol  Geranyl acetate |
| **fennel**  [127832-H4 J03] | TAOASIS®  TAOASIS GmbH, Detmold,  Germany | > 60  < 25  1.5 - 8.0 | trans-Anethole  Fenchone  Limonene |  |  |
| **lavandin super**  [01123G23] | PRIMAVERA®  LIFE GmbH,  Oy-Mittelberg,  Deutschland | n.s. | n.s. | 0.57  0.46  0.41  0.47  0.37  1.14  0.39  1.16  0.42  5.38  1.70  0.41  35.68  0.37  5.92  0.54  3.42  2.23  0.57  1.18  25.25  1.99  0.38  0.71  1.41  0.93  0.44  0.50 | a-Pinene  Camphene  Octen-3-ol + Sabinene  Octanone  b-Pinene  b-Myrcene  n-Hexyl acetate  Limonene  b-Phellandrene  1,8-Cineol + c-b-Ocimene  t-b-Ocimene  Terpinolene  Linalool  Octenyl acetate  Camphor  Lavandulol  Borneol  Terpinen-4-ol  c-Cymen-8-ol  a-Terpineol  Linalyl acetate + Geraniol  Lavandulol acetate  Neryl acetate  Geranyl acetate  b-Carophyllene  t-b-Franesene  Germacrene D  a-Bisabolol |
| **lavender fine**  [00523E24] | PRIMAVERA®  LIFE GmbH,  Oy-Mittelberg,  Deutschland | n.s. | n.s. | 0.26  0.45  0.53  0.19  4.94  0.66  6.59  0.29  0.22  21.91  0.04  0.26  0.62  0.66  2.04  0.65  0.12  42.54  0.28  0.03  2.32  0.22  0.40  0.70  5.71  1.17  0.44  0.33 | 1-Octene-3-ol  3-Octanone + b-Pinene  b-Myrcene  Limonene  c-b-Ocimene + b-Phellandrene  1,8-Cineol  t-b-Ocimene  c-Linalool oxide  t-Linalool oxide + Terpinolene  Linalool  Octenyl acetate  Camphor  Lavandulol  Borneol  Terpinene-4-ol  a-Terpineol  Nerol  Linalyl acetate  Geraniol  Geranial  Lavandulol acetate  Neryl acetate  Geranyl acetate  a-Santalene  b-Caryophyllene  t-b-Farnesene  Germacrene D  Caryophyllene oxide |
| **lemon**  [00441B23] | PRIMAVERA®  LIFE GmbH,  Oy-Mittelberg,  Deutschland | n.s. | n.s. | 0.42  1.86  1.84  10.84  1.58  0.19  0.06  68.62  0.35  8.64  0.37  0.11  0.09  0.16  0.83  0.03  1.37  0.39  0.20  0.17  0.31  0.53 | a-Thujene  a-Pinene  Sabinene  b-Pinene  b-Myrcene  a-Terpinene  p-Cymene  Limonene  b-Phellandrene  g-Terpinene  Terpinolen  Linalool  Citronellal  a-Terpineoel  Neral  Geraniol  Geranial  Nerylacetate  Geranylacetate  b-Caryophyllene  t-a-Bergamottene  b-Bisabolene |
| **lemon grass**  [1663-124655] | Baldini  TAOASIS GmbH, Detmold,  Germany | 37 - 55  29 - 38  1.4 - 15 | Geranial  Neral  Geraniol | n.s. | n.s. |
| **manuka**  [042798-124682] | TAOASIS®  TAOASIS GmbH, Detmold,  Germany | 14 - 25  3.0 - 10  3.0 - 8.0 | Leptospermone  Iso-Leptospermone  Flavesone | 4.3  5.7  5.4  16.9 | delta-Cadinene  Flavesone  Iso-Leptospermone  Leptospermone |
| **indian melissa**  n.r. | TAOMED®  TAOASIS GmbH, Detmold,  Germany | 24 - 46  17 -26  9.0 - 18 | Citronellal  Geraniol  Citronellol | n.s. | n.s. |
| **neroli**  [00330K23] | PRIMAVERA®  LIFE GmbH,  Oy-Mittelberg,  Deutschland | n.s. | n.s. | 0.66  0.93  8.85  1.89  15.04  0.20  7.01  0.19  0.48  39.22  0.31  3.91  0.96  0.01  5.37  2.46  0.02  0.14  0.23  1.30  2.54  0.71  3.26  2.07 | a-Pinene  Sabinene  b-Pinene  b-Myrcene  Limonene  b-Phellandrene  t-b-Ocimene  g-Terpinene  Terpinolene + t-Linalool oxide  Linalool  Terpinen-4-ol  a-Terpineol  Nerol  Neral  Linalyl acetate  Geraniol  Geranial  Indol  Methyl anthranilate  Neryl acetate  Geranyl acetate  t-b-Caryophyllene  t-Nerolidol  t-t-Farnesol |
| **oregano**  [43878A-124744] | TAOASIS®  TAOASIS GmbH, Detmold,  Germany | 60 - 70  4.0 - 14  3.0 - 12 | Carvacrol  para-Cymene  gamma-Terpinene | 64.23  7.63  12.87  0.17 | Carvacrol  gamma-Terpinene  para-Cymene  beta-Caryophyllene |
| **palmarosa**  [5391027-120500] | TAOMED®  TAOASIS GmbH, Detmold,  Germany | 74 - 83  7.5 - 17  1.4 - 4.0 | Geraniol  Geranylacetate  Linalool | n.s. | n.s. |
| **ravintasara**  [00811M24] | PRIMAVERA®  LIFE GmbH,  Oy-Mittelberg,  Germany | n.s. | n.s. | 0.87  5.09  0.17  16.6  3.60  1.86  0.55  0.43  0.83  57.88  0.29  0.91  0.26  0.33  0.04  0.17  0.53  1.65  6.25  0.01  0.01  0.04  0.28  0.34  0.11  0.13  0.16 | a-Thujene  a-Pinene  Camphene  Sabinene  b-Pinene  b-Myrcene  a-Terpinene  p-Cymene  Limonene  1,8-Cineol + b-Phellandrene  t-b-Ocimene  g-Terpinene  c-Sabinene hydrate  Terpinolene  Linalool  t-Sabinene hydrate  d-Terpineol  Terpinen-4-ol  a-Terpineol  Neral  Geranial  Eugenol  b-Caryophyllene  a-Humulene  Germacrene D  b-Selinene  a-Selinene + Bicyclogermacrene |
| **rose geranium**  [1500969-124943] | TAOASIS®  TAOASIS GmbH, Detmold,  Germany | 20 - 38  11 - 21  3.0 - 15 | Citronellol  Geraniol  Linalool | 1.28  1.23  5.22  4.97  7.37  0.60  2.97  33.03  13.71  3.49 | Z-Rose oxide  Menthone  Isomenthone  Linalool  Citronellylformiate  a-Terpineol  Geranylformiate  Citronellol  Geraniol  10-e-g-Eudesmol |
| **tea tree**  n.r. | TAOASIS®  TAOASIS GmbH, Detmold,  Germany | > 30  10 - 28  5.0 - 13 | Terpinen-4-ol  gamma-Terpinene  alpha-Terpinene | n.s. | n.s. |
| **thyme**  [1013-123265] | TAOMED®  TAOASIS GmbH, Detmold,  Germany | 30 - 86  < 14  < 10 | Linalool  Terpinen-4-ol  Myrcene | 3.81  7.60  3.88  2.69  7.02  2.17  1.50  2.53  38.03  11.49  1.69  1.70 | alpha-Pinene + alpha-Thujene  beta-Myrcene  alpha-Terpinene  Limonene  gamma-Terpinene  para-Cymene  Terpinolene  trans-Thujanol  Linalool  Terpinen-4-ol  alpha-Terpineole  Terpenylacetate |
| **thyme linalool**  [00223B25] | PRIMAVERA®  LIFE GmbH,  Oy-Mittelberg,  Germany | n.s. | n.s. | 0.20  2.22  0.95  0.82  0.04  0.34  4.91  0.27  2.25  1.24  1.73  0.53  0.59  5.14  0.96  2.06  57.28  0.64  0.24  0.16  0.77  1.10  7.57  1.00  0.22  0.07  2.28  0.01  1.17 | laveo-b-Pinene  a-Pinene  Camphene  Sabinene + 1-Octen-3-ol  6-Methyl-5-heptene-2-one  b-Pinene  b-Myrcene  a-Phellandrene  a-Terpinene  p-Cymene  Limonene  b-Phellandrene  1,8-Cineol  g-Terpinene  c-Sabinene hydrate +c-Linalool oxide  Terpinolene + t-Linalool oxide  Linalool  Hotrienol  c-p-Menth-2-en-1-ol  t-p-Menth-2-en-1-ol  Camphor  Borneol  Terpinen-4.ol  a-Terpineneol  c-Dihydrocarvone  Citronellol + Nerol  Linalyl acetate  b-Caryophyllene  t-a-Bergamottene |
| **thyme thymol 19 %**  [00457E23] | PRIMAVERA®  LIFE GmbH,  Oy-Mittelberg,  Germany | n.s. | n.s. | n.s. | n.s. |
| **winter savory**  [1569-123973] | TAOASIS®  TAOASIS GmbH, Detmold,  Germany | 25 - 50  10 - 30  0.5 - 5.0 | Carvacrol  para-Cymene  Thymol | 0.94  0.90  0.94  10.67  13.83  1.03  1.34  0.99 6.44  49.59 | alpha-Thujene  Myrcene  alpha-Terpinene  gamma-Terpinene  para-Cymene  Terpinen-4-ol  Borneole  beta-Bisabolene  Thymol  Carvacrol |
